# Supplementary material for: The design of transcription-factor binding sites is affected by combinatorial regulation
Source: PubMed Central journal article supplement (PMC1414079; doi:10.1186/gb-2005-6-12-r103), 2005-12-02
Supplement: gb-2005-6-12-r103-S1.pdf [file gb-2005-6-12-r103-S1.pdf]

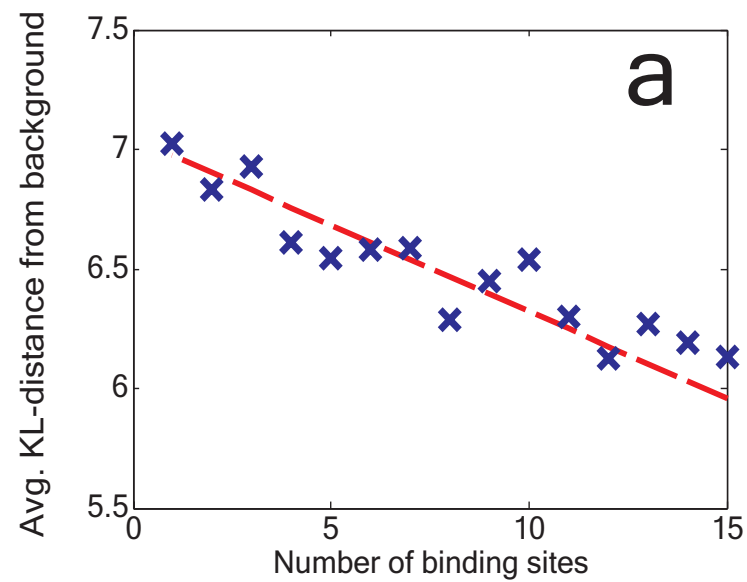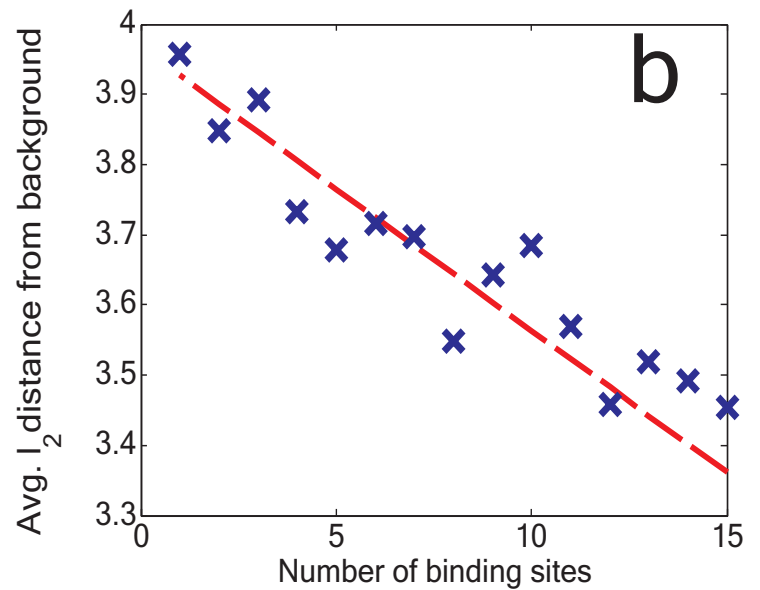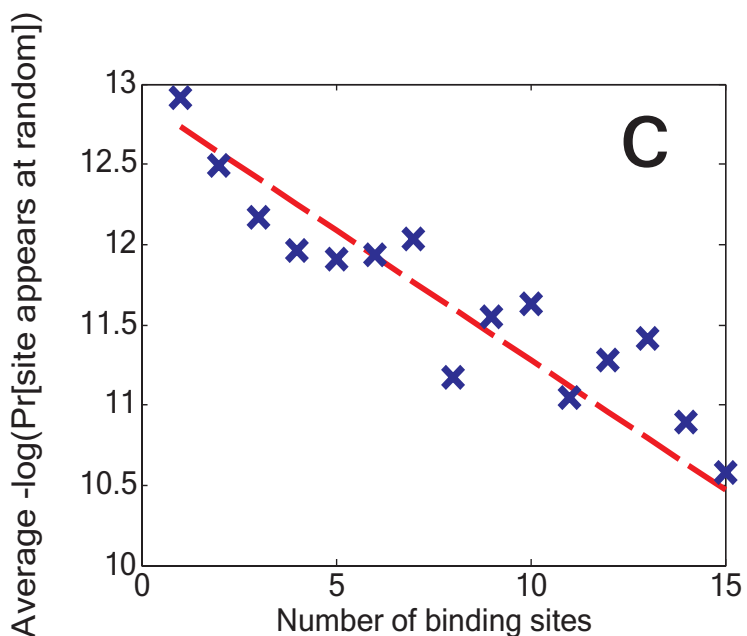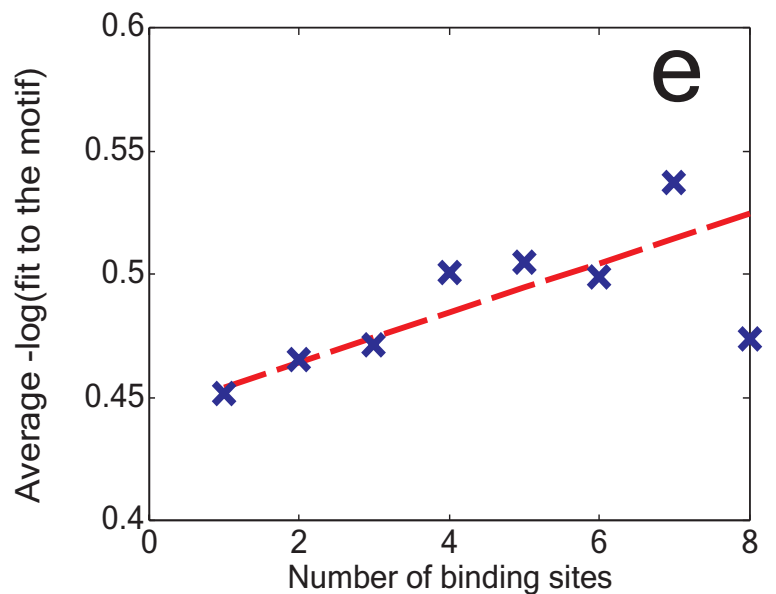

Supplementary Figure 1: Effective length and fuzziness of motifs as a function of the number of binding sites in the promoter region. (a) Average KL-distance of motif from the background distribution. (b) Average Euclidean distance of motif from the background distribution. (c) Average probability that a site appears at random ( $-\log$  values are shown). (d) Average fit of site to to motif ( $-\log$  values are shown). Dashed red lines depict the linear line which best matches the data points.
