# Supplementary material for: The design of transcription-factor binding sites is affected by combinatorial regulation
Source: PubMed Central journal article supplement (PMC1414079; doi:10.1186/gb-2005-6-12-r103), 2005-12-02
Supplement: gb-2005-6-12-r103-S2.pdf [file gb-2005-6-12-r103-S2.pdf]

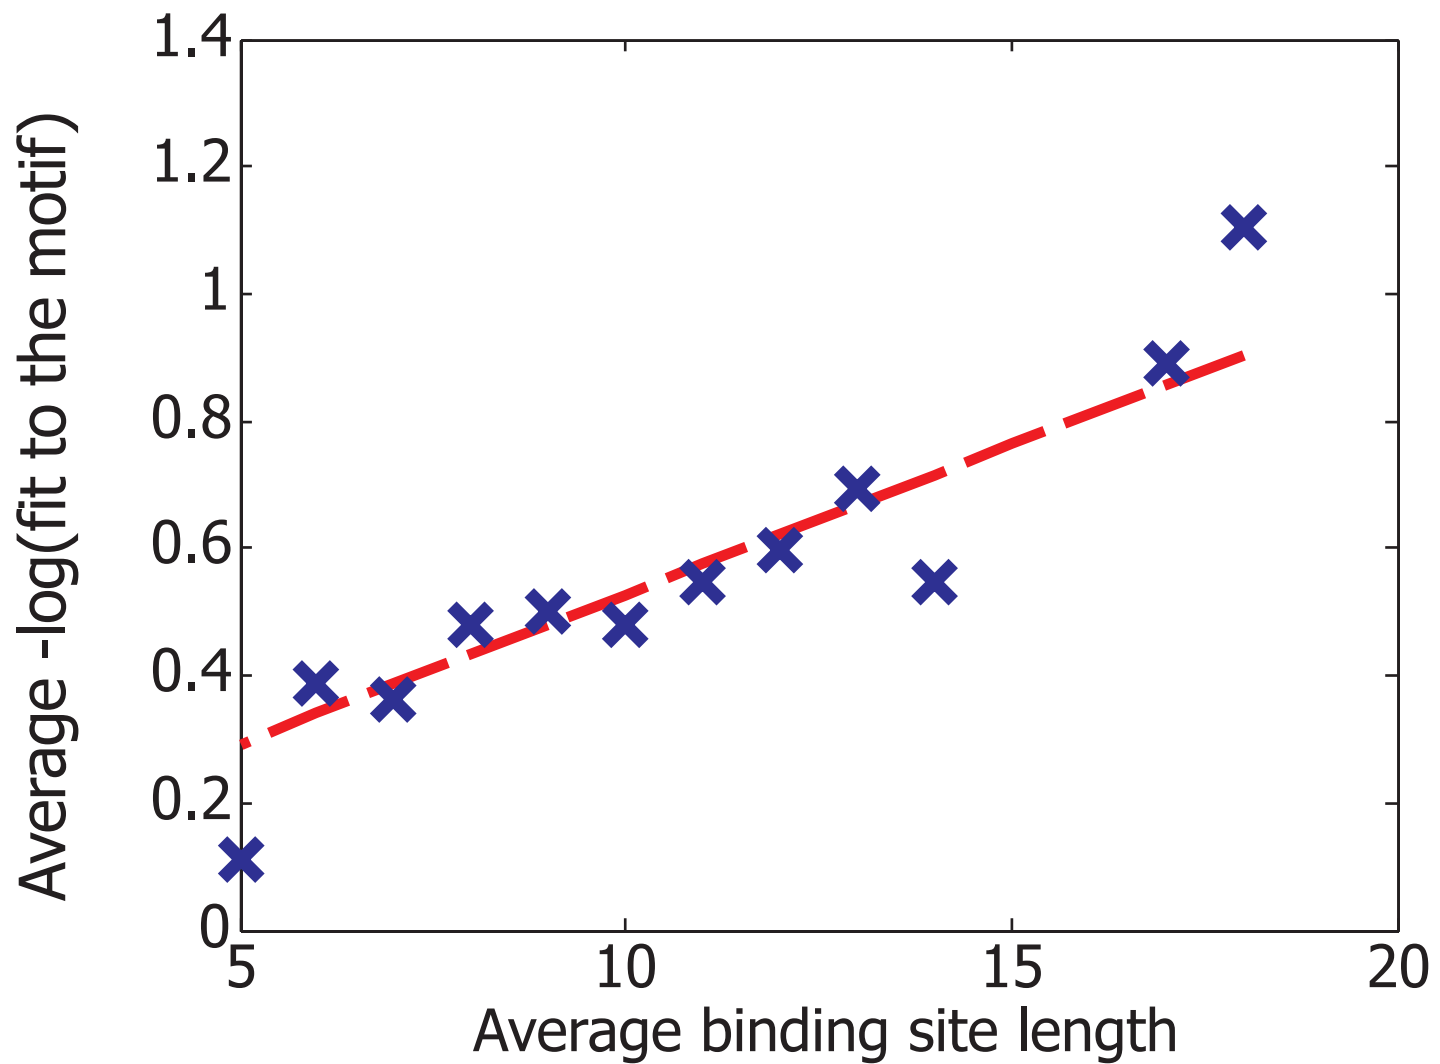

**Supplementary Figure 2:** Correlation between fit of binding sites to the motif and the length of the motif. For motif fit, average  $-\log$  values are shown. Dashed red line depicts the linear line which best fits the data.
