# Supplementary material for: The design of transcription-factor binding sites is affected by combinatorial regulation
Source: PubMed Central journal article supplement (PMC1414079; doi:10.1186/gb-2005-6-12-r103), 2005-12-02
Supplement: gb-2005-6-12-r103-S5.pdf [file gb-2005-6-12-r103-S5.pdf]

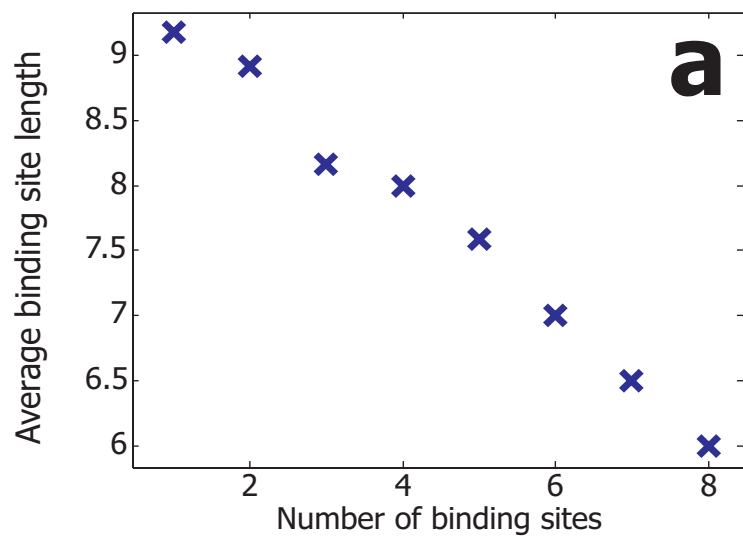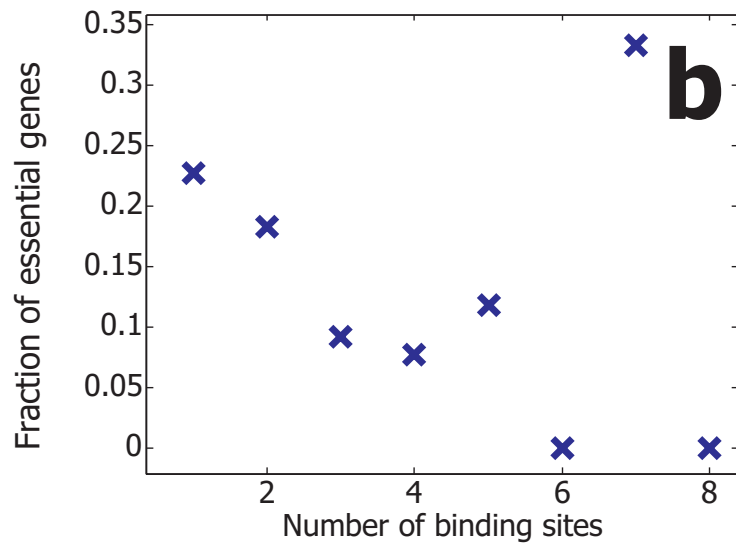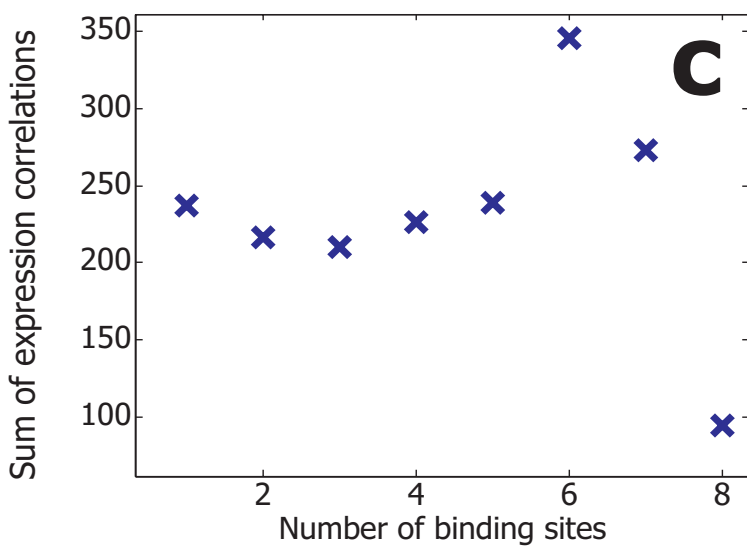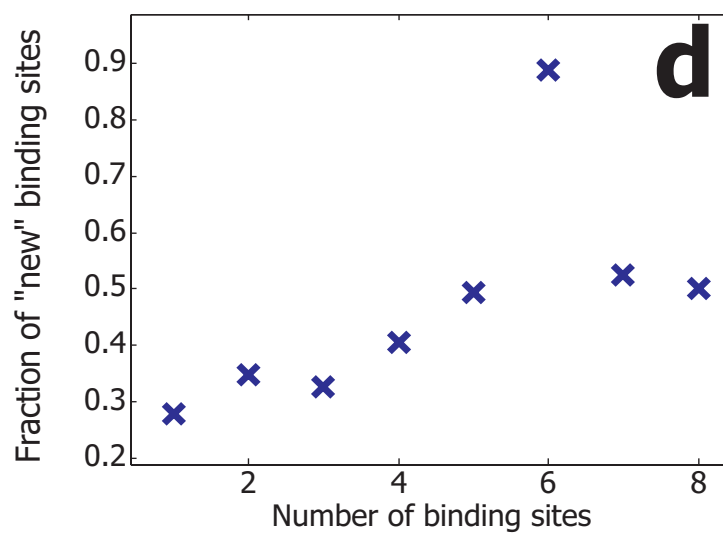

**Supplementary Figure 5:** Average promoter and gene properties as a function of the number of binding sites, for promoters to which exactly one factor binds. (a) Average binding site length; (b) Fraction of essential genes; (c) Sum of expression correlations; (d) Fraction of binding sites which are "new" - not conserved in other species.
